# Supplementary material for: Development of (4-Phenylamino)quinazoline Alkylthiourea Derivatives as Novel NF-κB Inhibitors
Source: MDPI journal article supplement (doi:10.3390/ph15070778), 2022-06-22

# Supplementary Material

## Development of (4-phenylamino)quinazoline Alkylthiourea Derivatives as Novel NF- $\kappa$ B Inhibitors

Sarah S. Darwish <sup>1,2,†</sup>, Po-Jen Chen <sup>3,†</sup>, Mostafa M. Hamed <sup>4,†</sup>, Reem A. Wagdy <sup>1</sup>, Shun-Hua Chen <sup>5</sup>, Ashraf H. Abadi <sup>1</sup>, Mohammad Abdel-Halim <sup>1</sup>, Tsong-Long Hwang <sup>6,7,8,9,\*</sup> and Matthias Engel <sup>10,\*</sup>

<sup>1</sup> Department of Pharmaceutical Chemistry, Faculty of Pharmacy and Biotechnology, German University in Cairo, 11835 Cairo, Egypt; s.same@gaf.edu.eg (S.S.D.); reem.ahmed-afifi@guc.edu.eg (R.A.W.); ashraf.abadi@guc.edu.eg (A.H.A.); mohammad.abdel-halim@guc.edu.eg (M.A.-H.)

<sup>2</sup> School of Life and Medical Sciences, University of Hertfordshire hosted by Global Academic Foundation, New Administrative Capital, 11578 Cairo, Egypt

<sup>3</sup> Department of Medical Research, E-Da Hospital, Kaohsiung City 824005, Taiwan; littlep@hotmail.com

<sup>4</sup> Drug design and optimization, Helmholtz Institute for Pharmaceutical Research Saarland (HIPS), Helmholtz Centre for Infection Research, Saarland University Campus, 66123 Saarbrücken, Germany; mostafa.hamed@helmholtz-hips.de

<sup>5</sup> School of Nursing, Fooyin University, Kaohsiung 831, Taiwan; ft104@fy.edu.tw

<sup>6</sup> Graduate Institute of Natural Products, College of Medicine, Chang Gung University, Taoyuan 333, Taiwan

<sup>7</sup> Research Center for Chinese Herbal Medicine, Graduate Institute of Health Industry Technology, College of Human Ecology, Chang Gung University of Science and Technology, Taoyuan 333, Taiwan

<sup>8</sup> Department of Anesthesiology, Chang Gung Memorial Hospital, Taoyuan 333, Taiwan

<sup>9</sup> Department of Chemical Engineering, Ming Chi University of Technology, New Taipei City 243, Taiwan

<sup>10</sup> Pharmaceutical and Medicinal Chemistry, Saarland University, Campus C2.3, 66123 Saarbrücken, Germany

† These authors contributed equally to this work.

\* Correspondence: htl@mail.cgu.edu.tw (T.-L.H.); ma.engel@mx.uni-saarland.de (M.E.); Tel.: +886-3-2118506 (T.-L.H.); +49-681-302-70312 (M.E.); Fax: +886-3-2118506 (T.-L.H.); +49-681-302-70308 (M.E.)

### Contents

1. Table S1
2. <sup>1</sup>H-NMR (500 MHz, DMSO) and <sup>13</sup>C-NMR (126 MHz, DMSO) spectra of newly synthesized compounds.

**Table S1.** Selectivity profiling of compound **19** against the protein kinases known to regulate the NF- $\kappa$ B pathway

| kinase                       | % Inhibition at 2 $\mu$ M <sup>a</sup> |
|------------------------------|----------------------------------------|
|                              | <b>19</b>                              |
| CHUK (IKK alpha)             | 6                                      |
| IRAK1                        | 2                                      |
| MAP3K14 (NIK)                | 9                                      |
| MAP3K7/MAP3K7IP1 (TAK1-TAB1) | 3                                      |
| RIPK2                        | 29                                     |
| GSK3B (GSK3 beta)            | 4                                      |
| IKBKB (IKK beta)             | 3                                      |
| IKBKE (IKK epsilon)          | 3                                      |
| IRAK4                        | 5                                      |
| MAPK14 (p38 alpha)           | 4                                      |
| MAPK3 (ERK1)                 | 2                                      |
| PRKCI (PKC iota)             | n.i.                                   |
| PRKCQ (PKC theta)            | n.i.                                   |
| PRKCZ (PKC zeta)             | 3                                      |
| RPS6KA1 (RSK1)               | 1                                      |
| TBK1                         | 8                                      |

<sup>a</sup>Screenings were performed as a service at Thermo Fisher Scientific at an ATP concentration of 100  $\mu$ M. n.i., no inhibition. Data represent mean values of duplicates that differed by less than 7%.

Figure S1  $^1\text{H}$ -NMR (500 MHz, DMSO) and  $^{13}\text{C}$ -NMR (126 MHz, DMSO) spectra

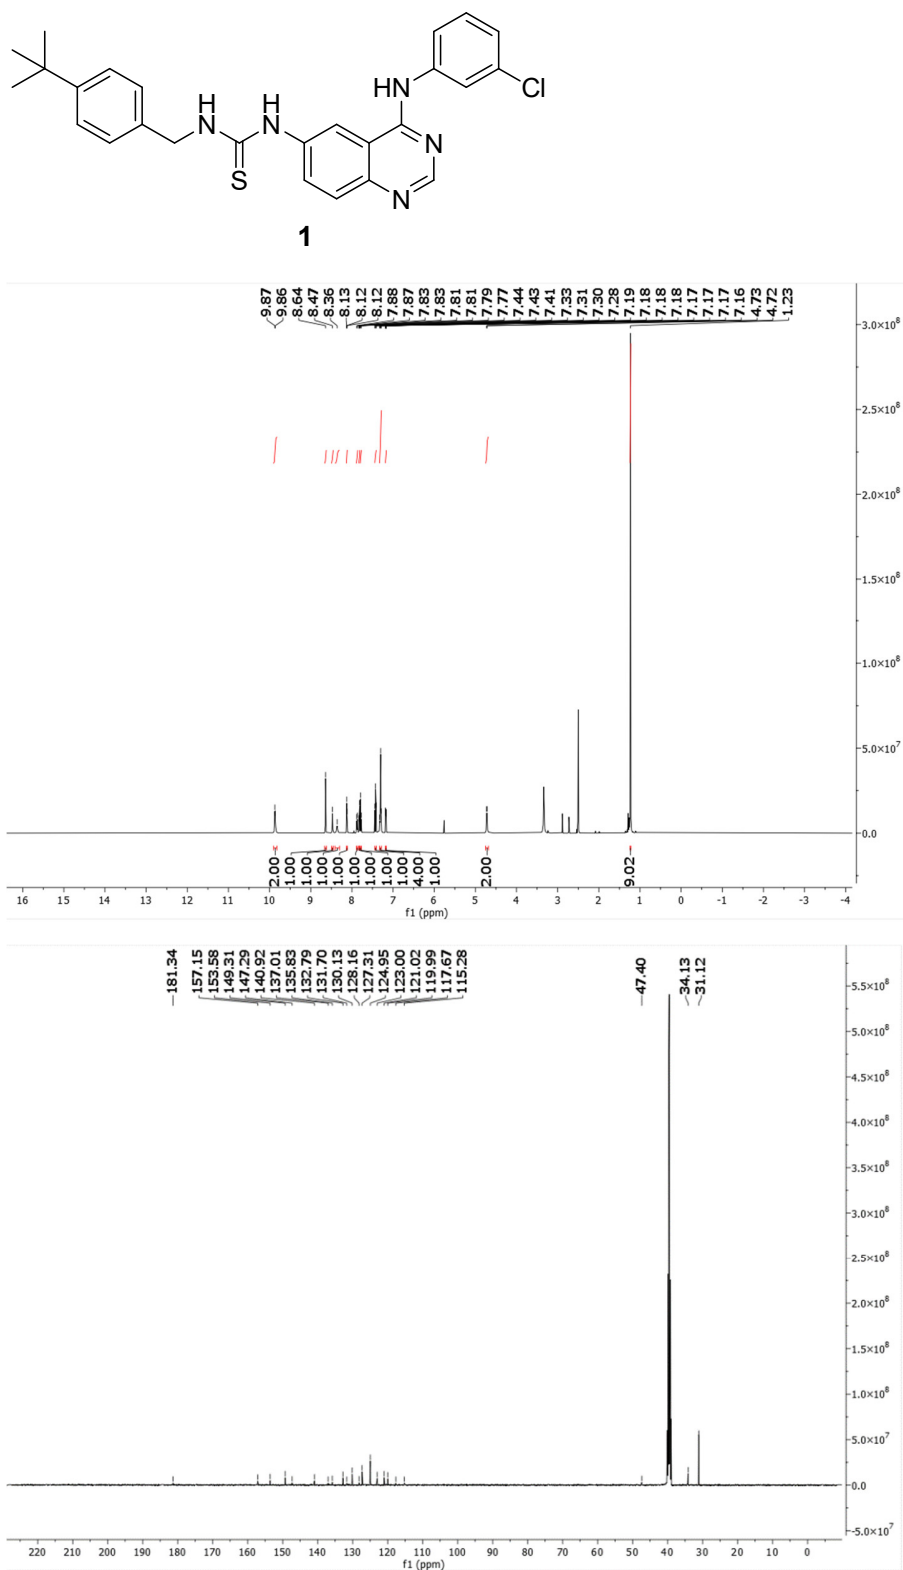

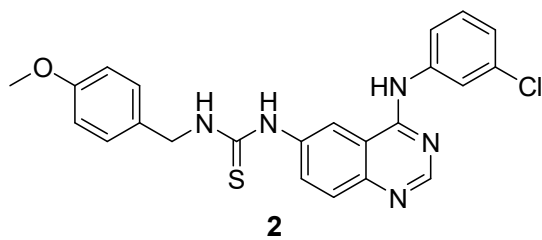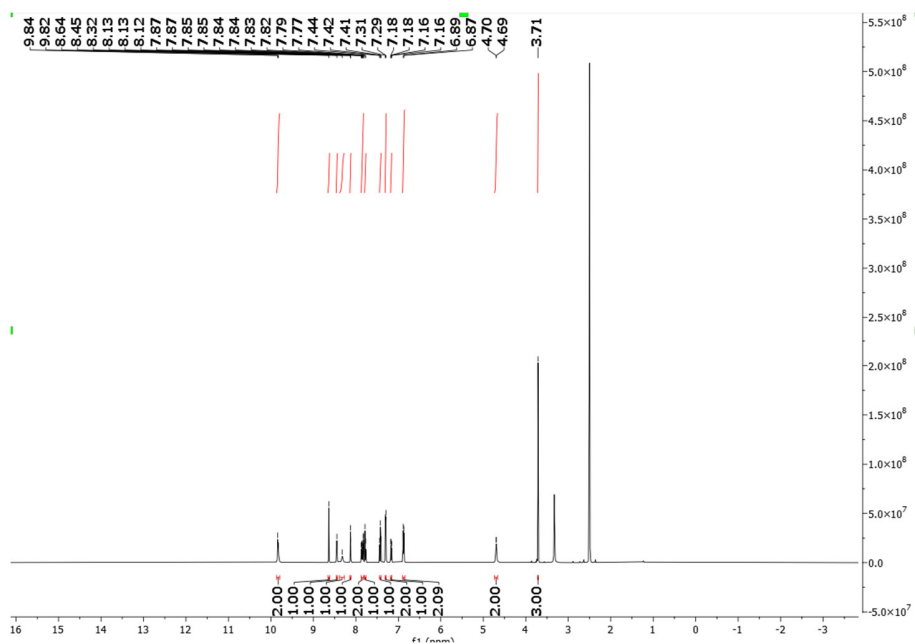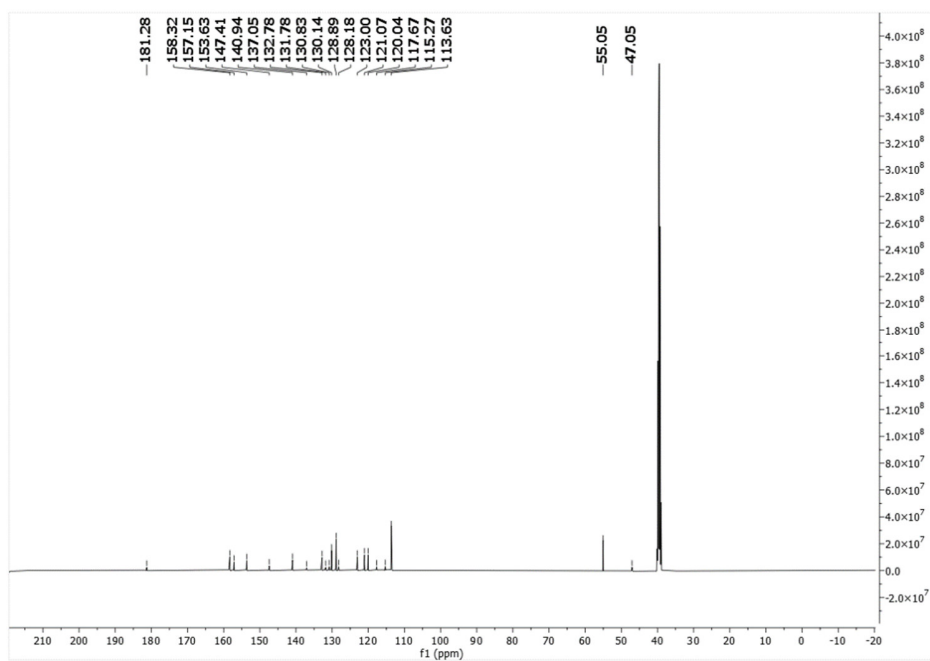

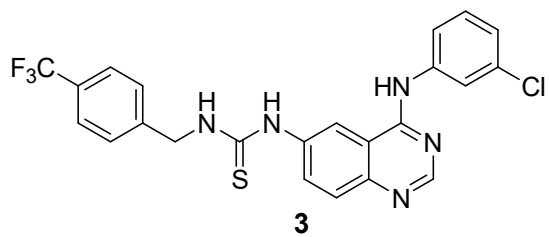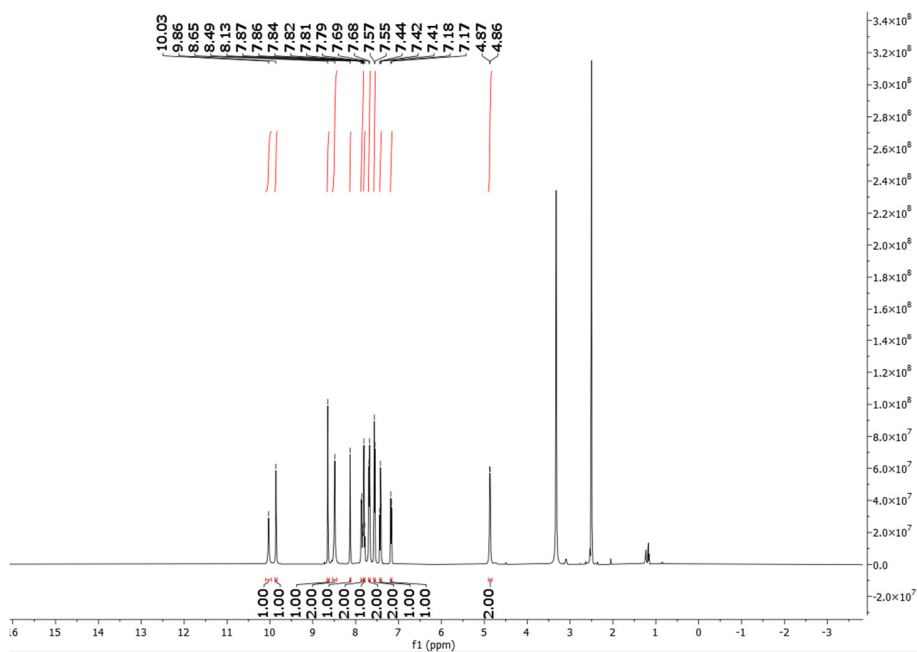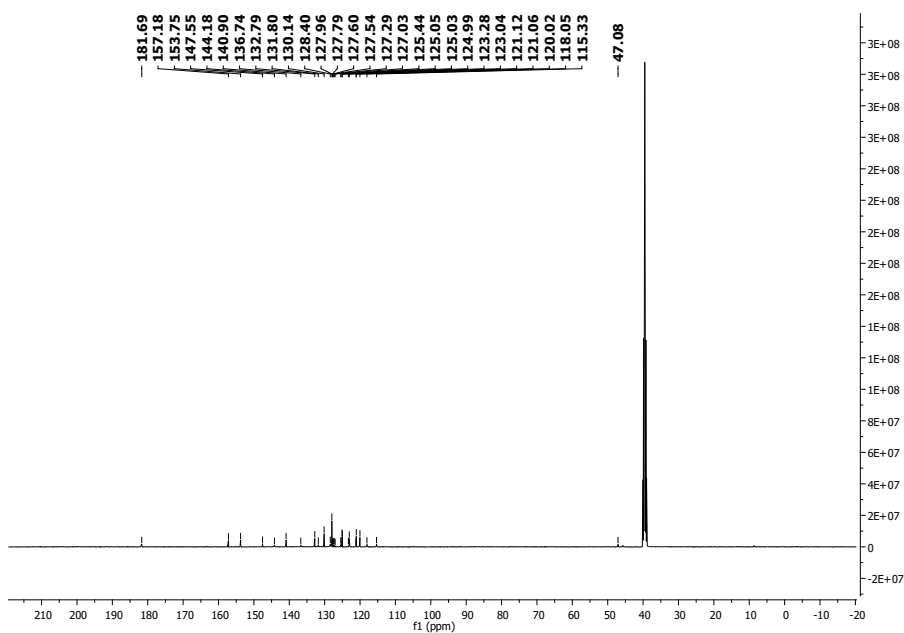

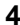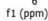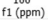

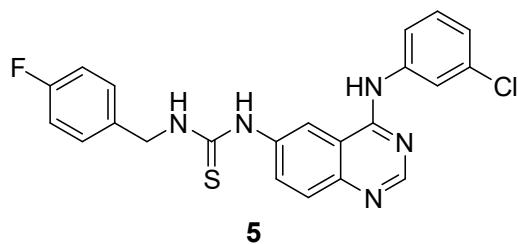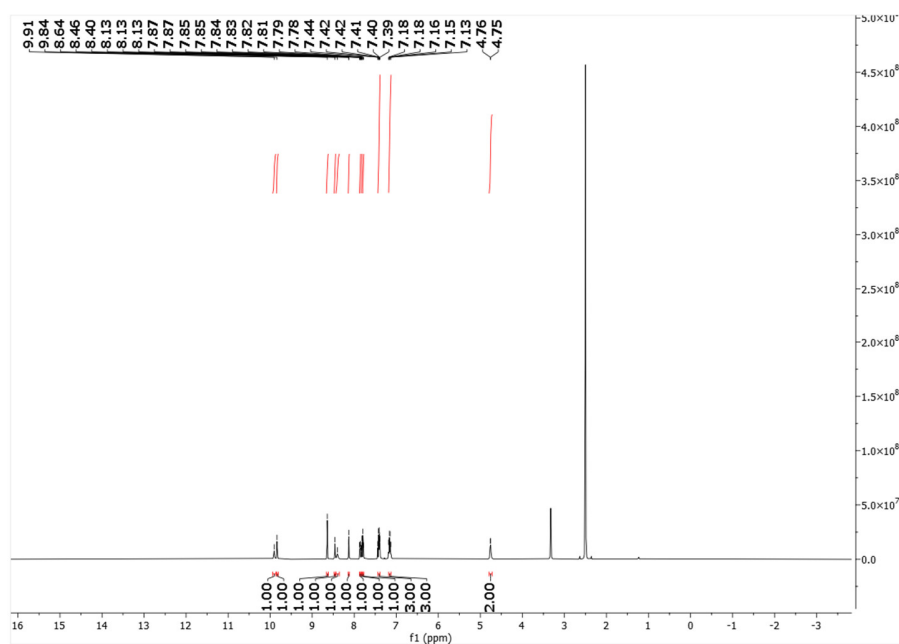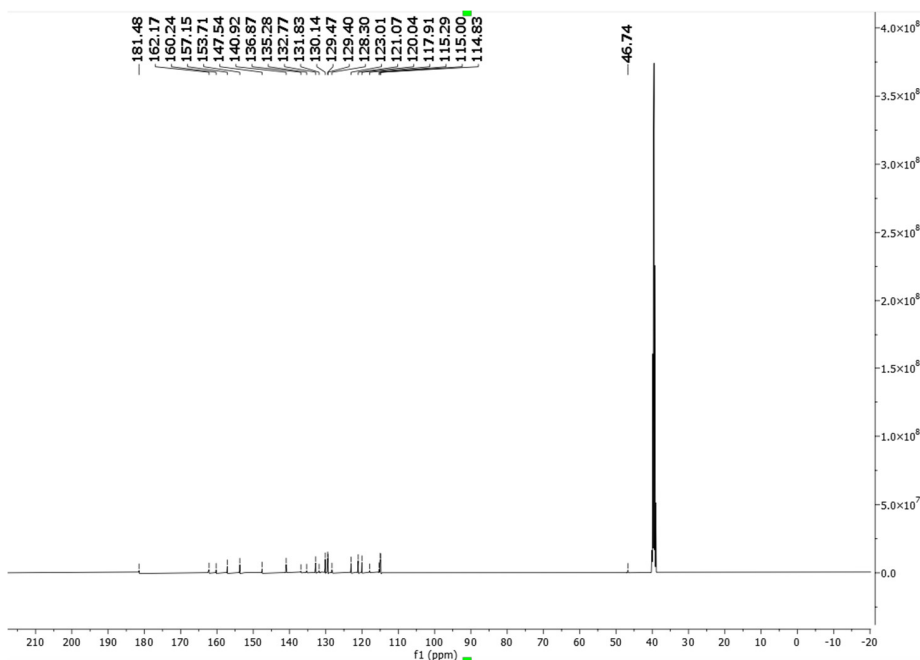

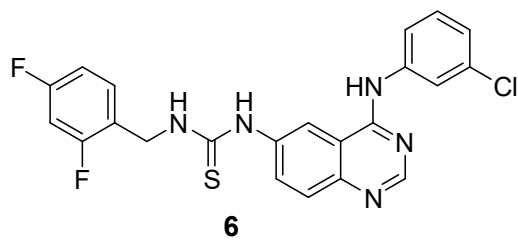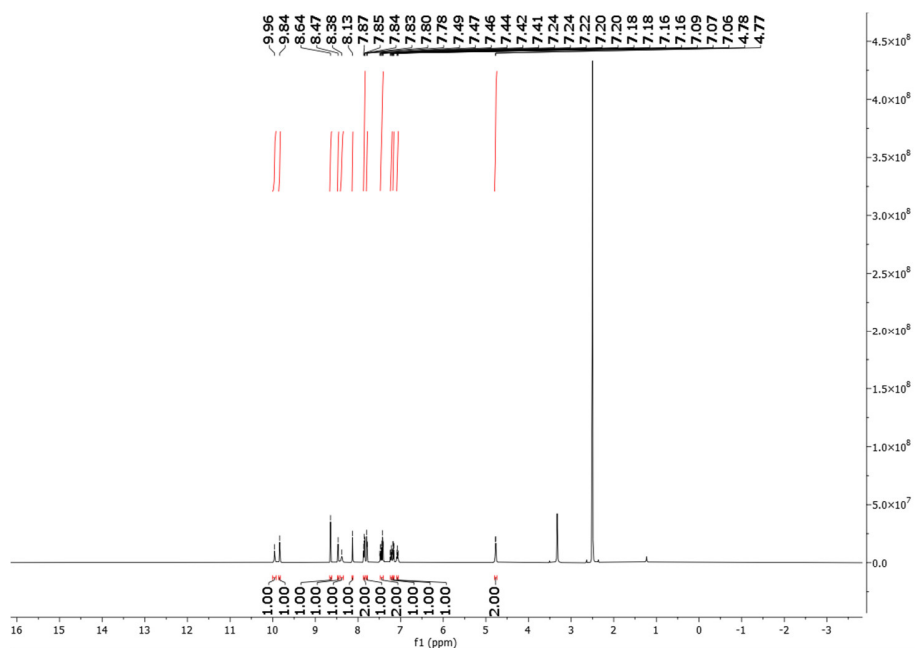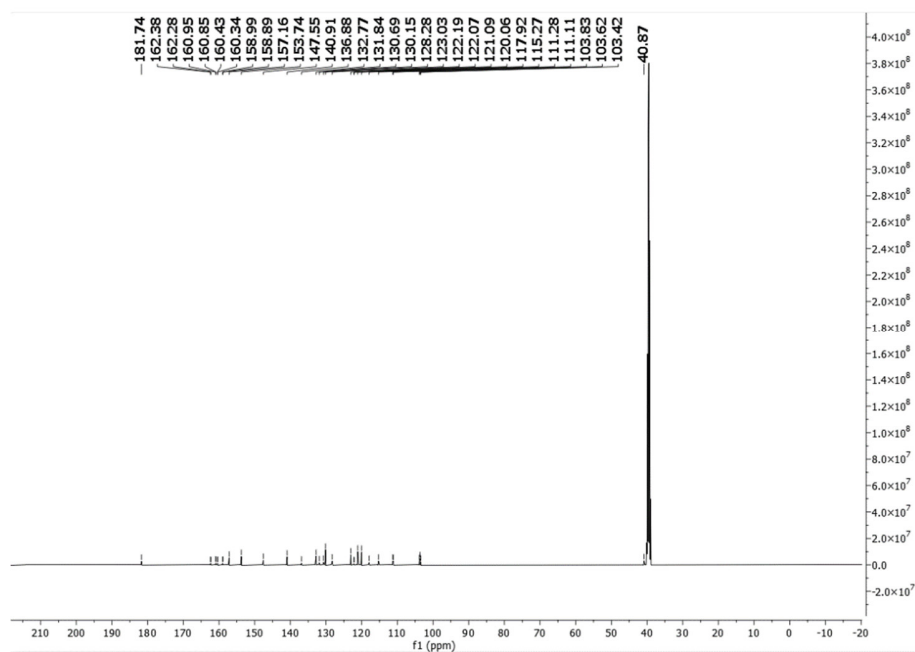



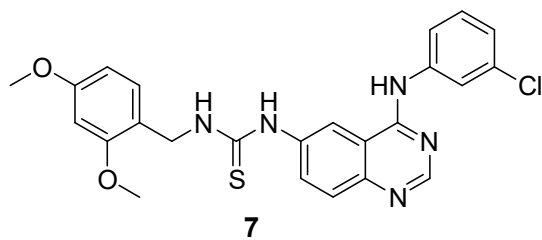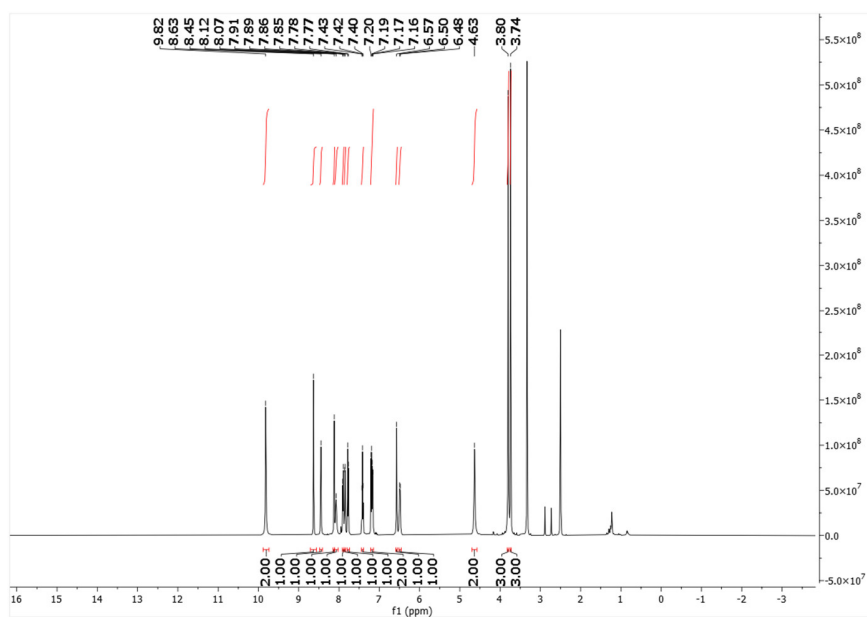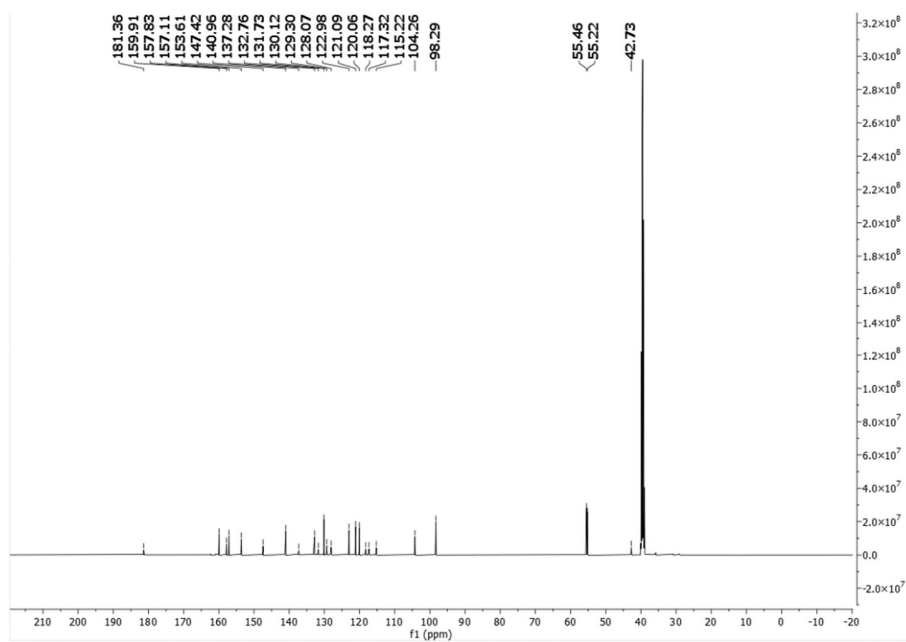

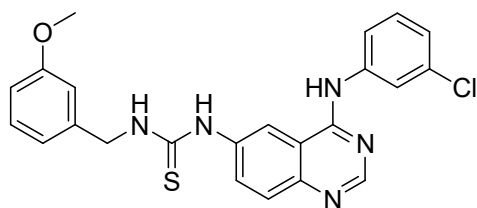

8

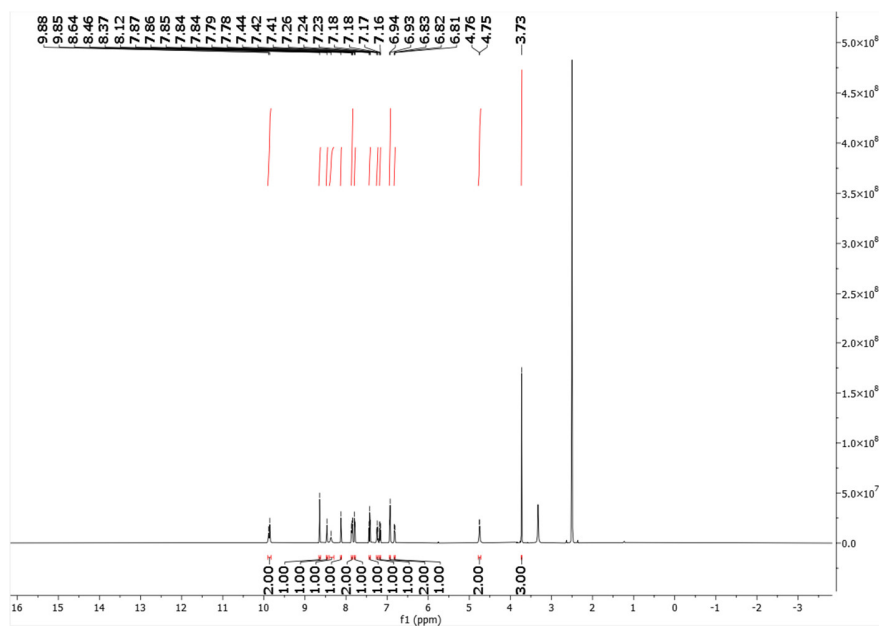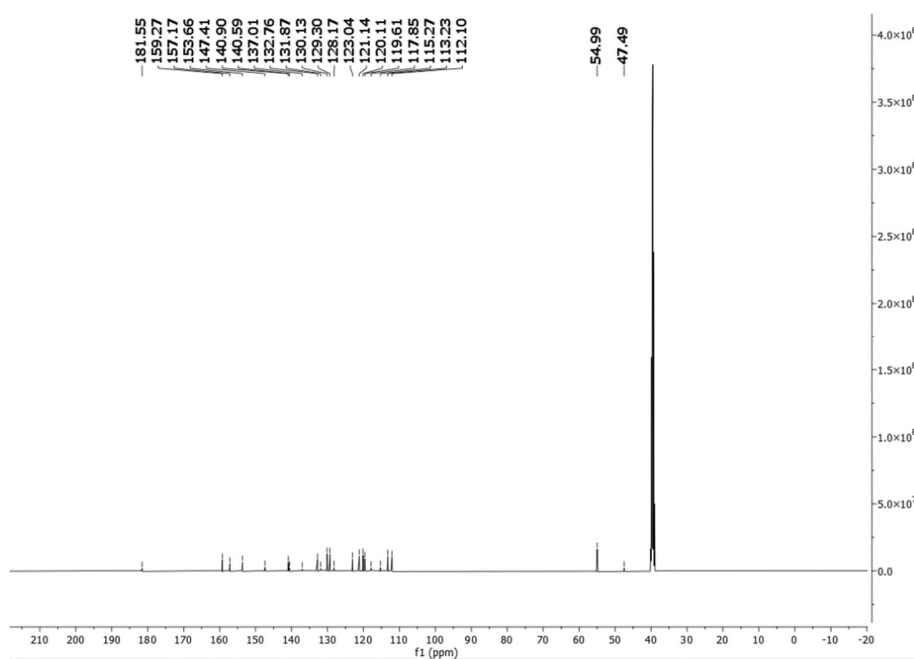

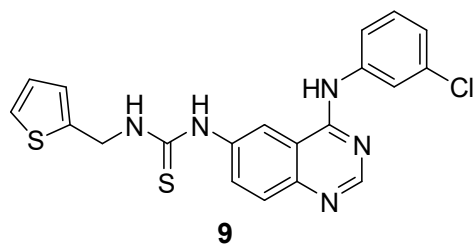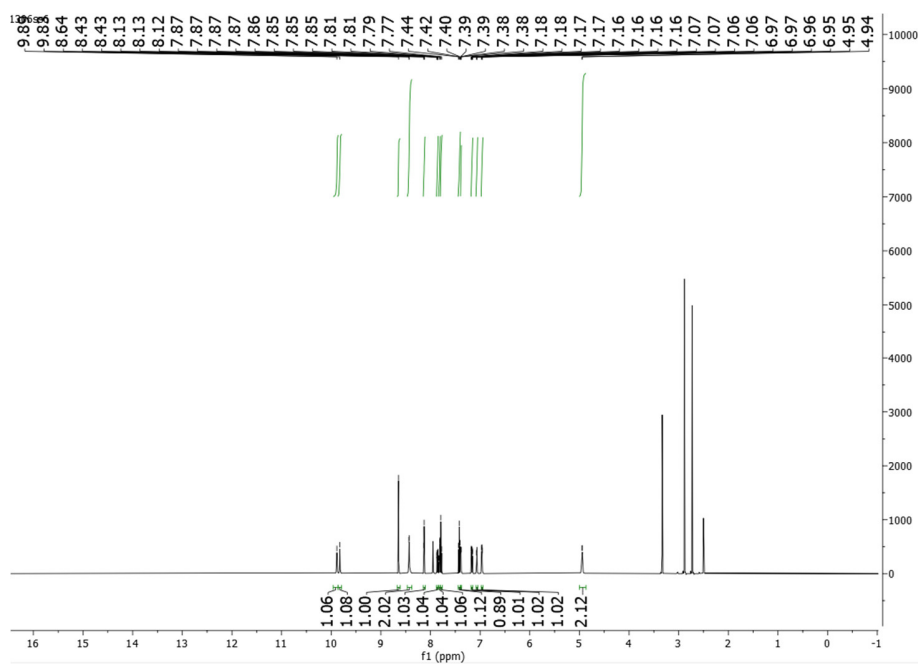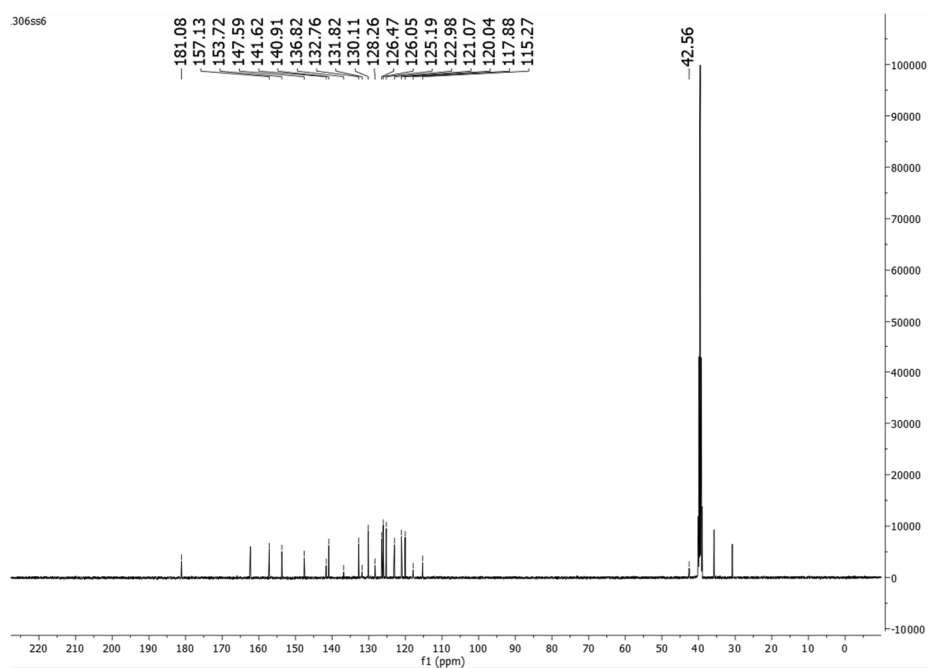

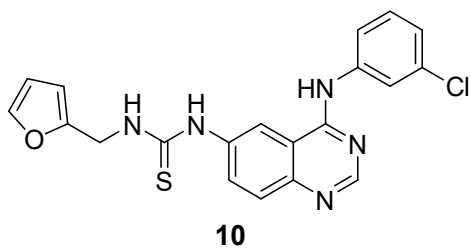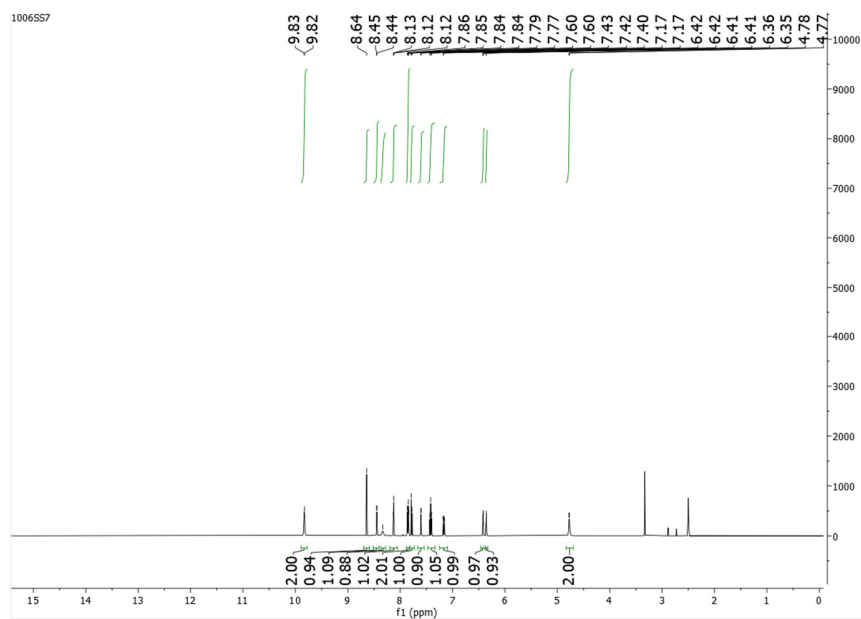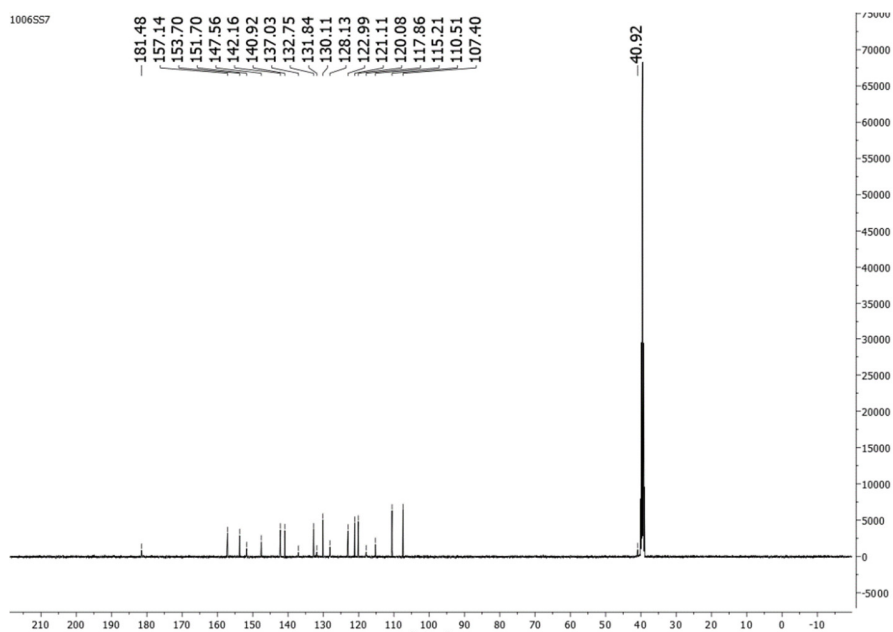

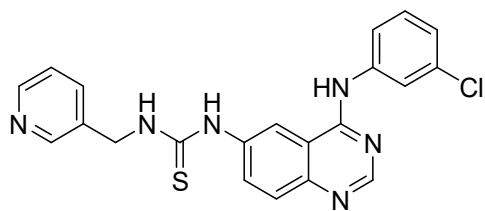

11

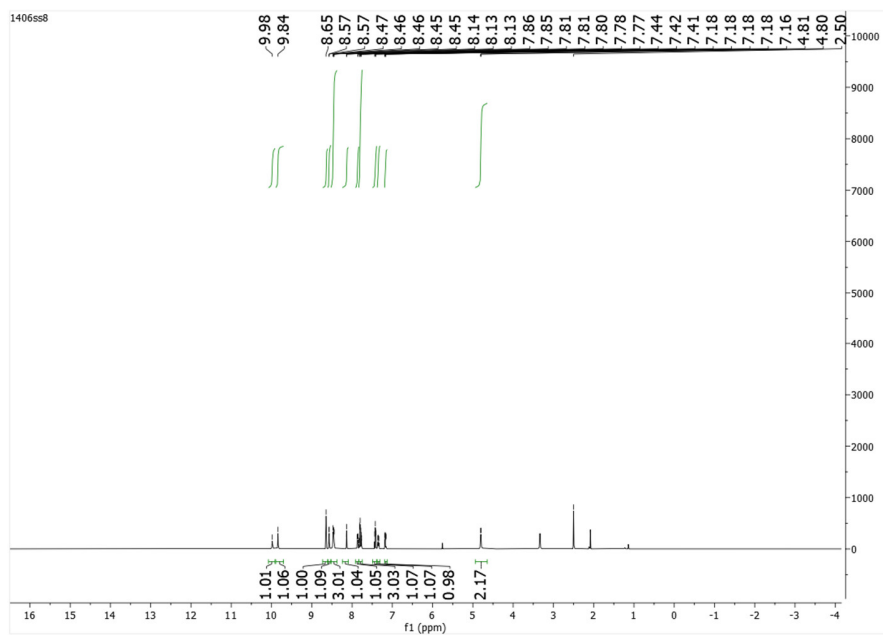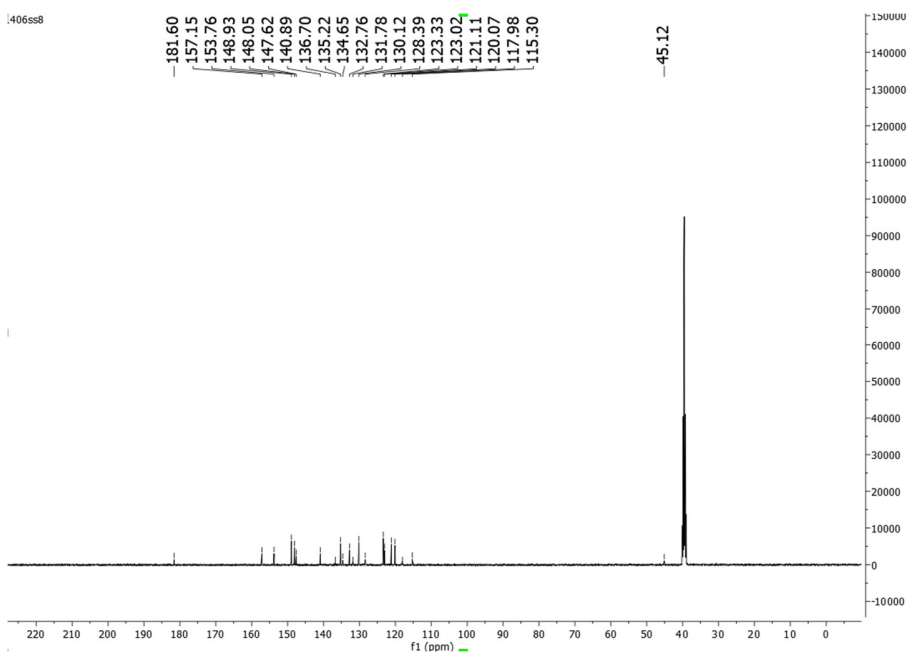

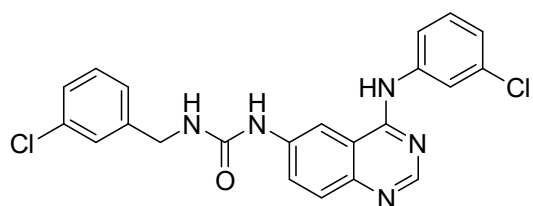

**12**

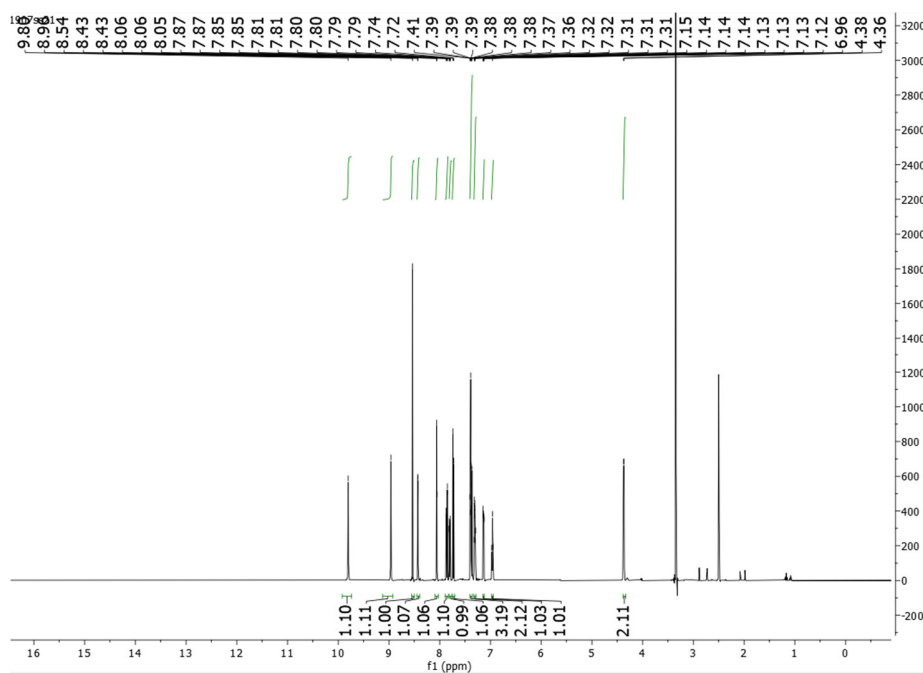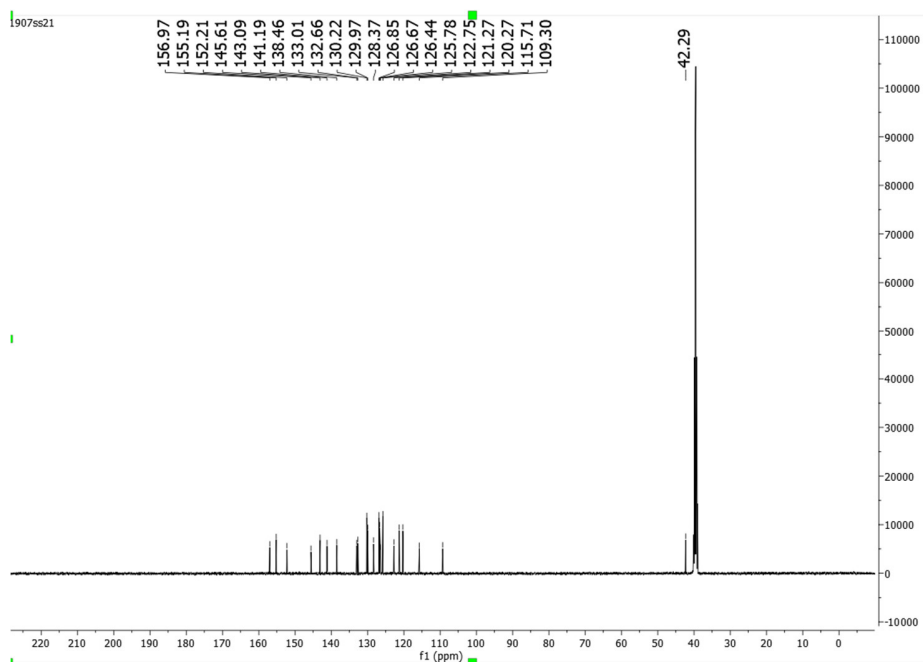

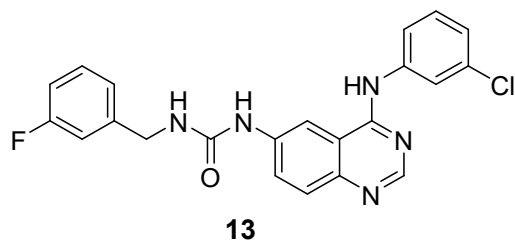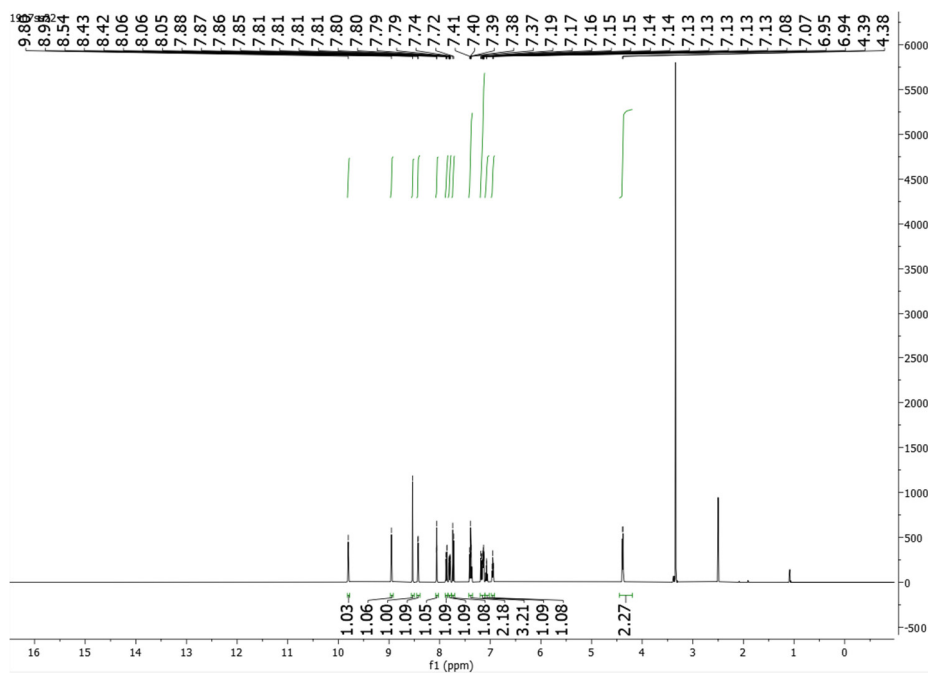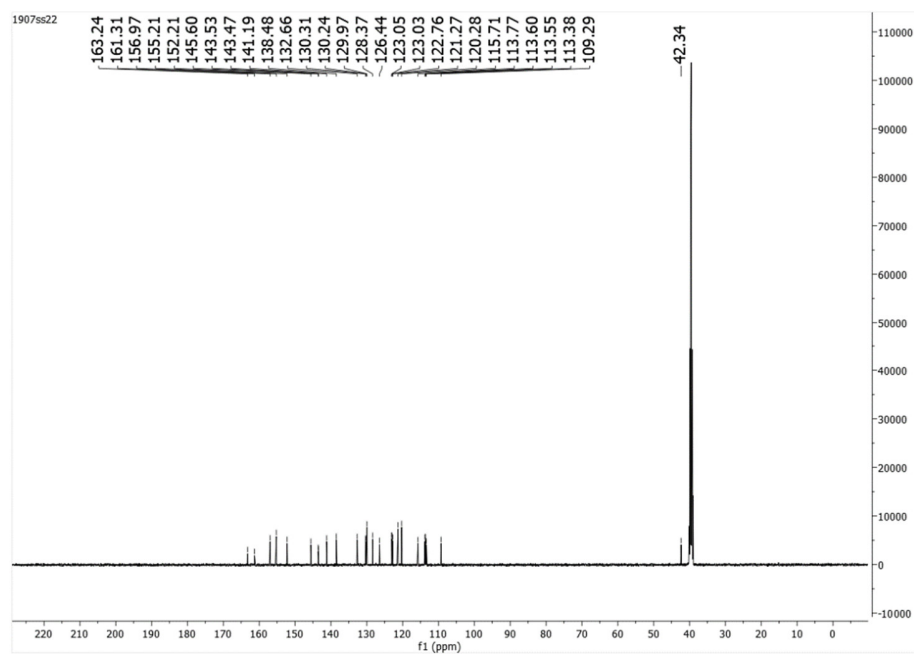

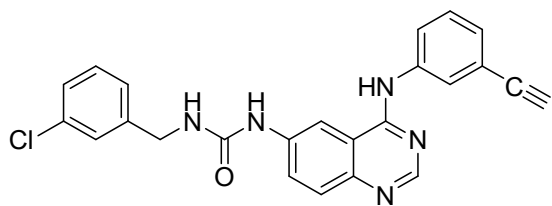

**14**

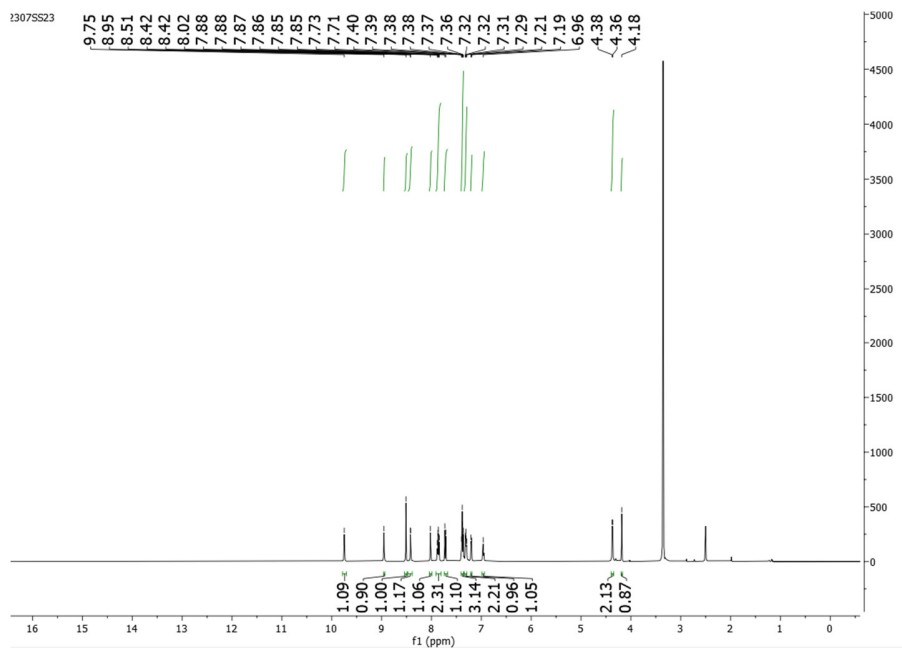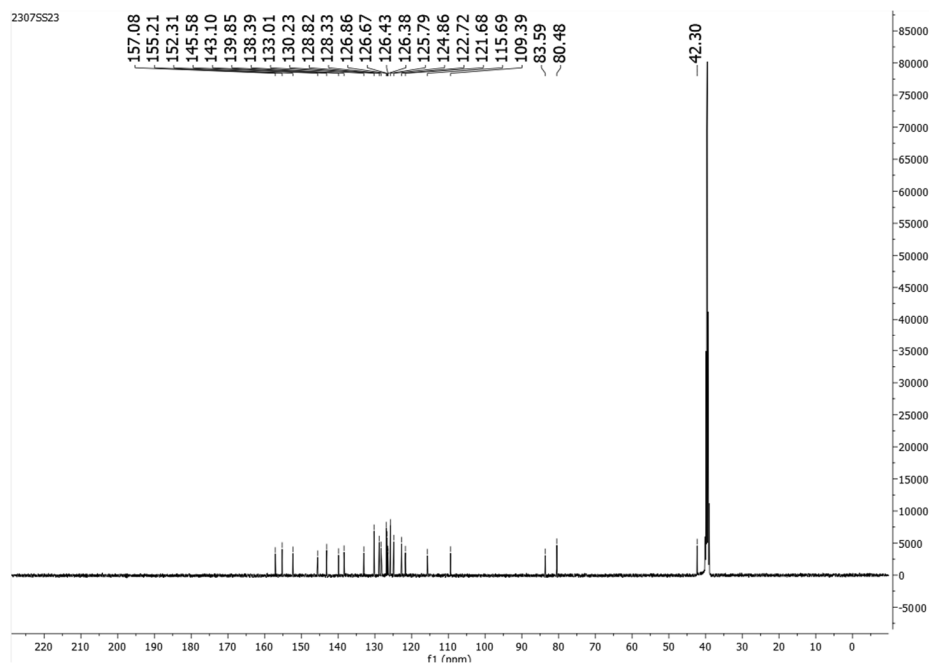



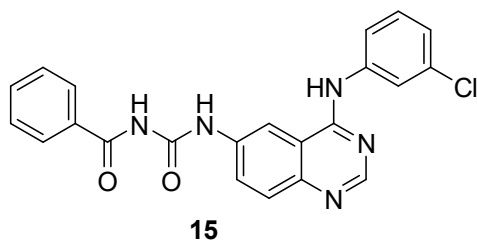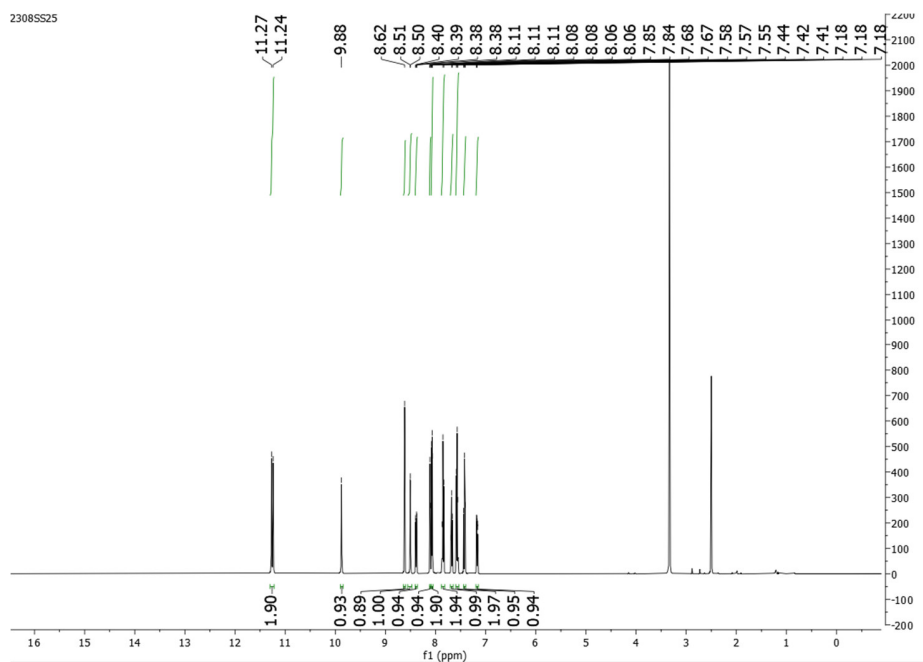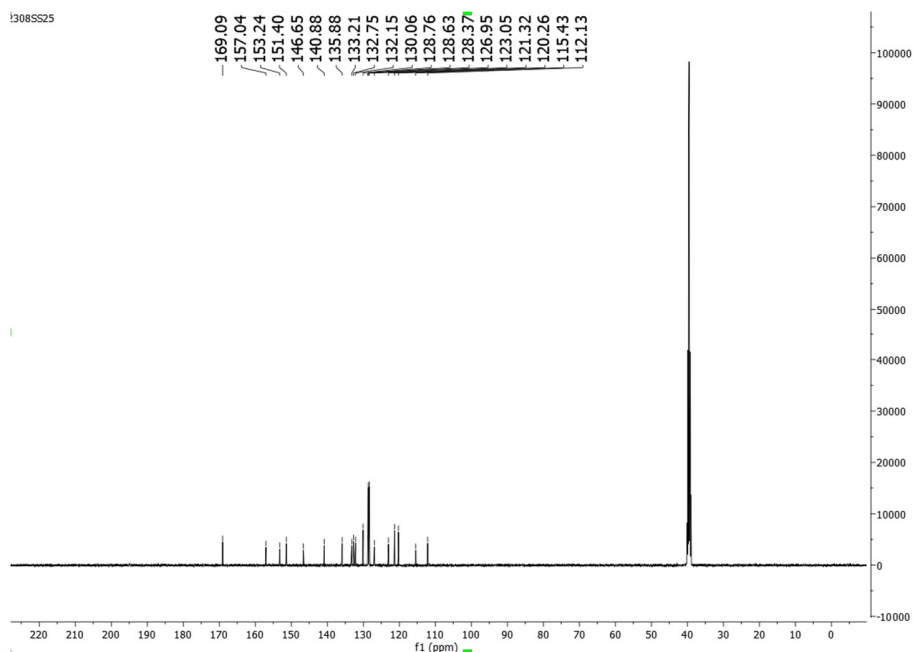

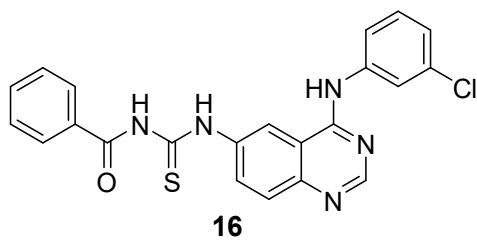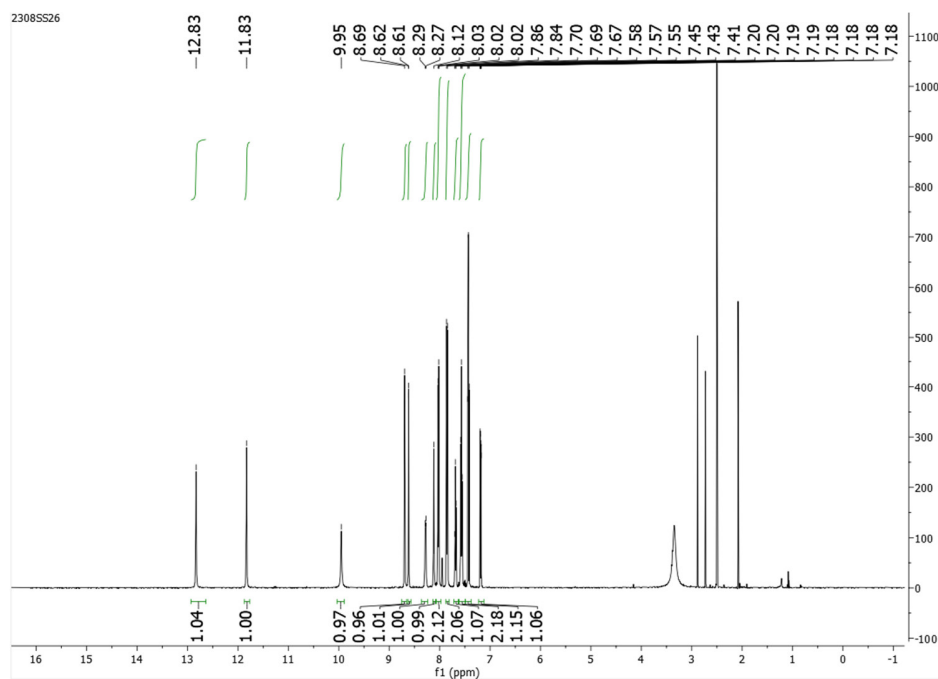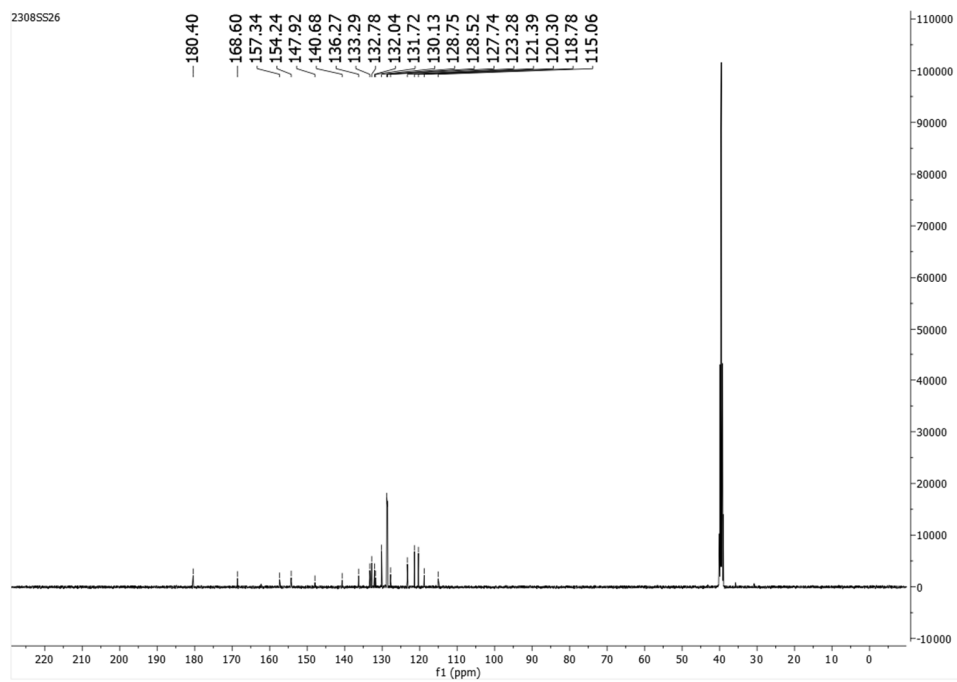

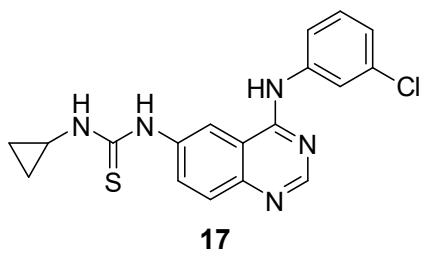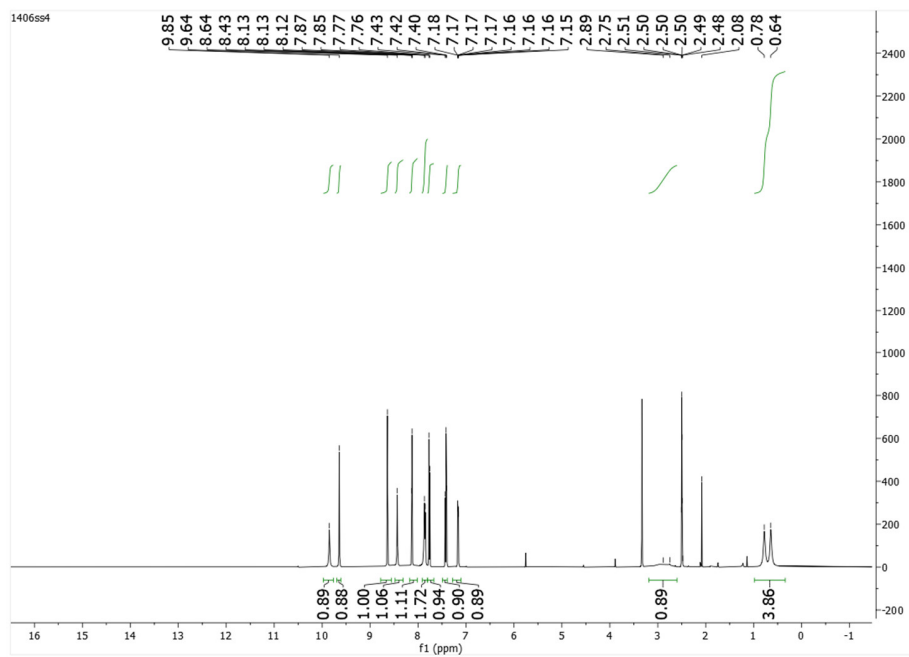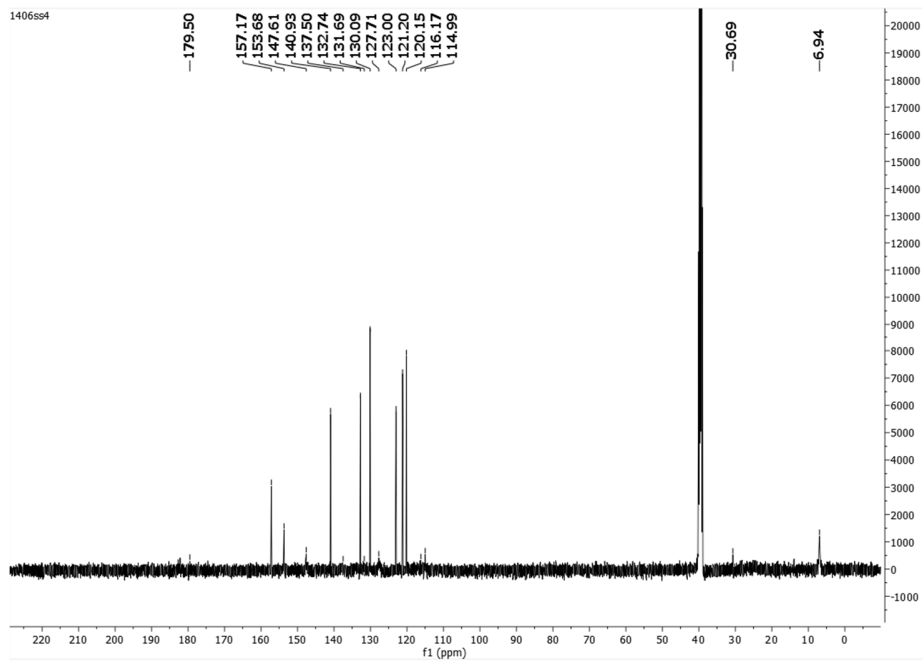

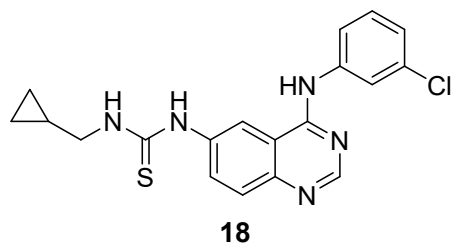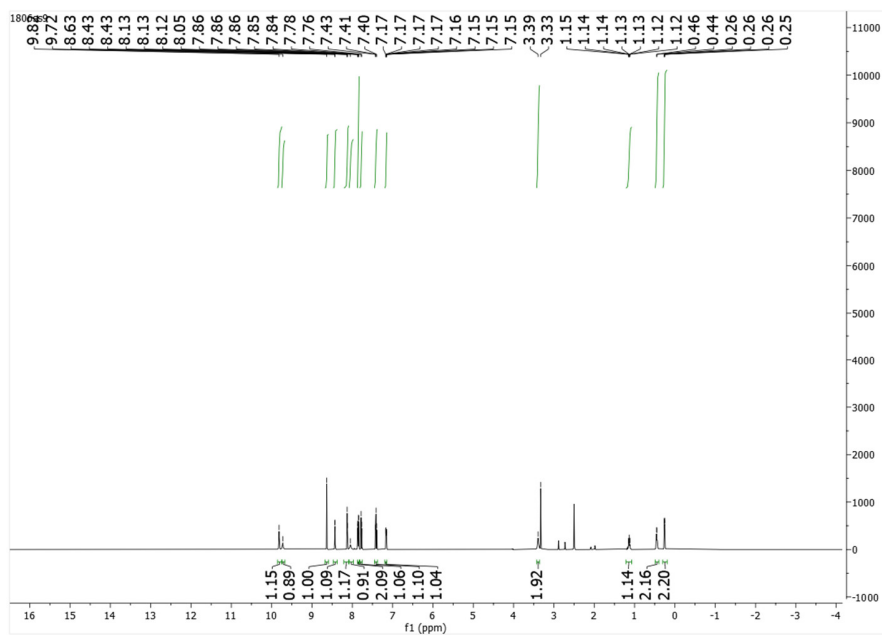

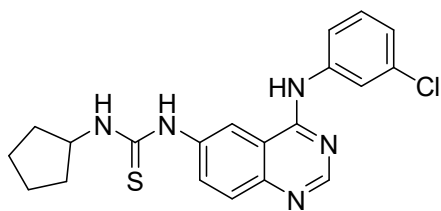

19

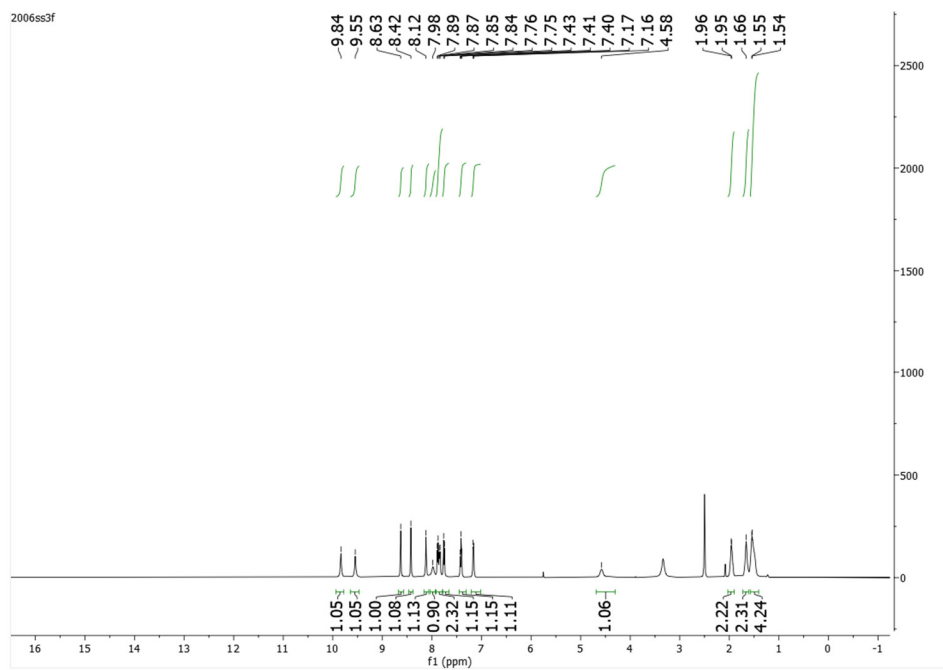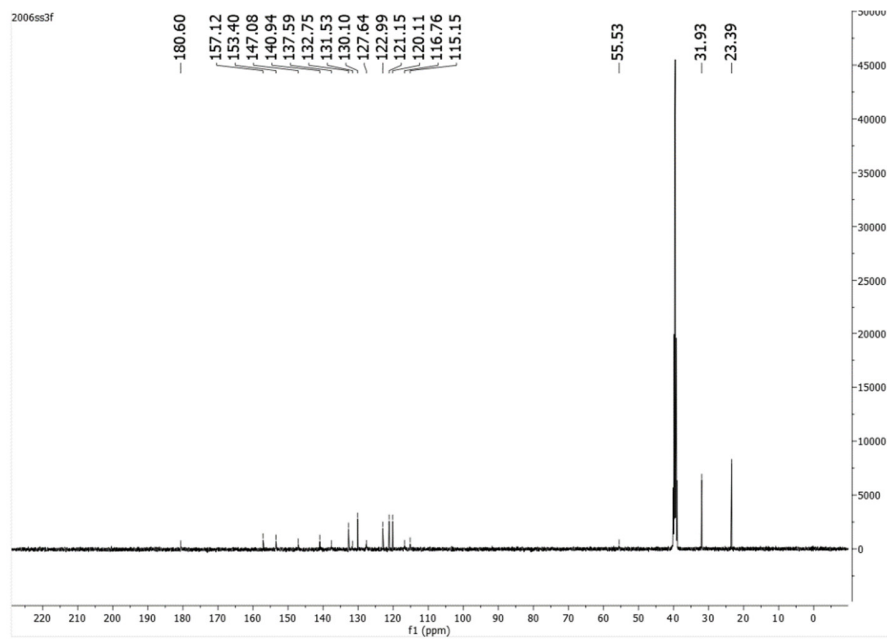

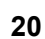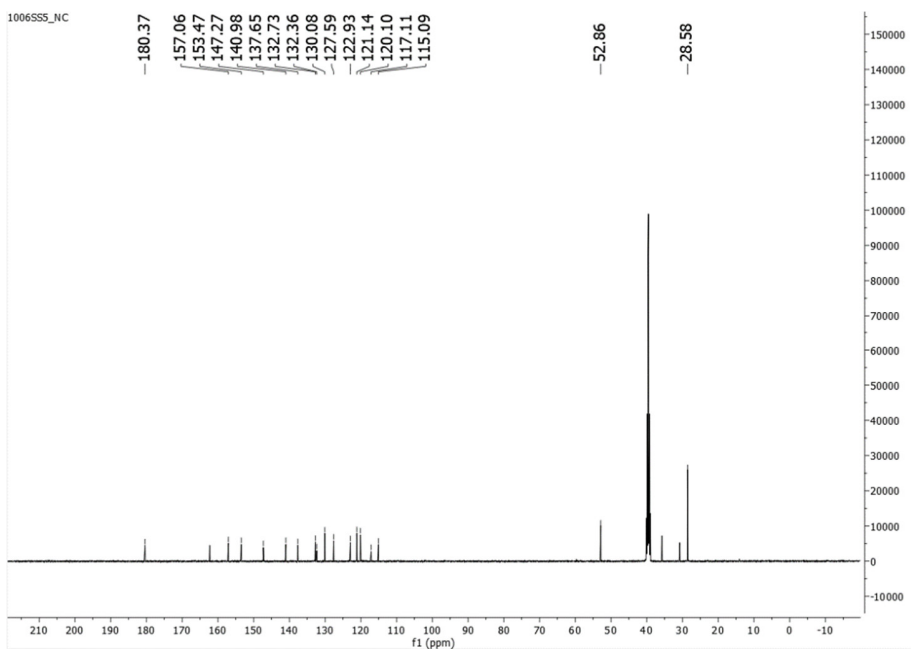

Supplement: s1 [file s1]
